1 **PI-Plat: A high-resolution image-based 3D reconstruction**  
2 **method to estimate growth dynamics of rice inflorescence**  
3 **traits**

4 Jaspreet Sandhu<sup>1,\*</sup>, Feiyu Zhu<sup>2,\*</sup>, Puneet Paul<sup>1,\*</sup>, Tian Gao<sup>2,\*</sup>, Balpreet K. Dhatt<sup>1</sup>, Yufeng Ge<sup>3</sup>,  
5 Paul Staswick<sup>1</sup>, Hongfeng Yu<sup>2</sup>, Harkamal Walia<sup>1,†</sup>

6

7 \*equal contributing authors

8 † corresponding author: [hwalia2@unl.edu](mailto:hwalia2@unl.edu)

9 <sup>1</sup> Department of Agronomy and Horticulture, University of Nebraska-Lincoln

10 <sup>2</sup> Department of Computer Science and Engineering, University of Nebraska-Lincoln

11 <sup>3</sup> Biological Systems Engineering Department, University of Nebraska-Lincoln

12

13

14

15

16

17

18

19

20

21

22

23

24 **Abstract**

25 **Background**

26 Recent advances in image-based plant phenotyping have improved our capability to study vegetative stage  
27 growth dynamics. However, more complex agronomic traits such as inflorescence architecture (IA), which  
28 predominantly contributes to grain crop yield are more challenging to quantify and hence are relatively less  
29 explored. Previous efforts to estimate inflorescence-related traits using image-based phenotyping have been  
30 limited to destructive end-point measurements. Development of non-destructive inflorescence phenotyping  
31 platforms could accelerate the discovery of the phenotypic variation with respect to inflorescence dynamics  
32 and mapping of the underlying genes regulating critical yield components.

33 **Results**

34 The major objective of this study is to evaluate post-fertilization development and growth dynamics of  
35 inflorescence at high spatial and temporal resolution in rice. For this, we developed the *Panicle Imaging*  
36 *Platform* (PI-Plat) to comprehend multi-dimensional features of IA in a non-destructive manner. We used  
37 11 rice genotypes to capture multi-view images of primary panicle on weekly basis after the fertilization.  
38 These images were used to reconstruct a 3D point cloud of the panicle, which enabled us to extract digital  
39 traits such as voxel count and color intensity. We found that the voxel count of developing panicles is  
40 positively correlated with seed number and weight at maturity. The voxel count from developing panicles  
41 projected overall volumes that increased during the grain filling phase, wherein quantification of color  
42 intensity estimated the rate of panicle maturation. Our 3D based phenotyping solution showed superior  
43 performance compared to conventional 2D based approaches.

44 **Conclusions**

45 For harnessing the potential of the existing genetic resources, we need a comprehensive understanding of  
46 the genotype-to-phenotype relationship. Relatively low-cost sequencing platforms have facilitated high-  
47 throughput genotyping, while phenotyping, especially for complex traits, has posed major challenges for  
48 crop improvement. PI-Plat offers a low cost and high-resolution platform to phenotype inflorescence-  
49 related traits using 3D reconstruction-based approach. Further, the non-destructive nature of the platform  
50 facilitates analyses of the same panicle at multiple developmental time points, which can be utilized to  
51 explore the genetic variation for dynamic inflorescence traits in cereals.

52

53 **Keywords**

54 plant phenotyping, rice, inflorescence dynamics, 3D imaging, panicle volume, voxel count, panicle  
55 maturation, grain filling

56

## 57 **Background**

58 With increasing world population, climatic variability and declining arable land resources, the need to  
59 increase global food production is paramount [1–3]. Two components that are essential for achieving global  
60 food security involve precise agronomic management and genetic improvement of major crops such as rice,  
61 wheat, and maize. Integral to both components is the development of data-driven tools that increase  
62 precision in implementation and enhance predictive capabilities. Moreover, strategic selection and  
63 adaptation of yield-related traits to maximize agricultural production holds the key to achieve sustainable  
64 food security [4–6]. Inflorescence architecture (IA) is an important phenotypic feature that ultimately  
65 contributes to most of the grain crop yield components such as grain number, size, and weight [7–9].  
66 However, the complexity of IA, especially in cereals, is a limiting factor for accurate determination of yield  
67 traits. Estimating the yield-related traits by conventional methods is subjective, laborious, and error-prone  
68 [10]. Also, the scope of the detectable yield-related traits is limited by manual measurements, which  
69 increases the chances of damaging the inflorescence.

70 Advances in automation of plant phenotyping technologies, mainly in reference to image-based  
71 phenotyping, have increased the depth and the scale of measuring vegetative traits [11–19]. However, only  
72 a few studies have used the phenotyping platform to screen IA [16, 20–22]. Some platforms have utilized  
73 machine-vision-based approaches to estimate inflorescence-related parameters [23–26]. In addition, two-  
74 dimensional (2D) imaging platforms have been employed, for example, *Tassel Image-based Phenotyping*  
75 *System* (TIPS) quantifies morphological traits from freshly harvested maize tassels, while *PAnicle*  
76 *SStructure Analyzer for Rice* (PASTAR/PASTA), *Panicle TRAIT Phenotyping* (P-TRAP), and *PANorma*  
77 analyze rice panicle length and branching [20, 21, 27, 28]. Both P-TRAP and PANorma have been used for  
78 genome-wide association studies (GWAS) with respect to rice panicle traits [27, 29–31]. Recently, Zhou *et*  
79 *al* [22] developed *Toolkit for Inflorescence Measurement* (TIM) to estimate sorghum panicle volume  
80 derived from two planar imaging data. The derived panicle-related traits of sorghum were used for GWAS  
81 to facilitate gene discovery.

82 Most of these 2D image-based IA approaches have discussed only the mature or end-point traits  
83 and do not capture the growth dynamics of developing inflorescence. Furthermore, biplanar images can  
84 only provide 2D projections of a 3D structure, thus accounting for substantial loss of spatial information  
85 [32]. 3D imaging has started to gain momentum to circumvent limitations of 2D imaging [33]. Different  
86 3D imaging methods, for example time of flight (ToF), laser scanning, stereovision among others, have  
87 been applied for remote sensing or field-based phenotyping platforms. In addition, depth cameras are also  
88 widely used for capturing an entire plant or large plants parts [34]. Stereovision, which considers object  
89 images from different angles to reconstruct 3D surfaces, offers an inexpensive, accurate and efficient  
90 method for on-site 3D plant imaging [32, 35, 36]. The recent introduction of freely available software –

91 Multi-View Environment (MVE) offers an end-to-end 3D reconstruction solution [37]. MVE combines the  
92 multi-view stereo (MVS) and structure-from-motion (SfM) algorithms to generate dense point clouds for  
93 3D object reconstruction [37]. The MVS-SfM approach has been used to reconstruct 3D meshes of leaves,  
94 canopy or whole plant [38–41]. However, this approach has not been used to characterize IA. Here, we  
95 present the results from characterizing rice panicles using the 3D reconstruction-based approach. The main  
96 objectives of our study were to (a) capture multi-dimensional, high-resolution images of ‘panicle on plant’  
97 after the fertilization to reconstruct 3D plant cloud of inflorescence, (b) use 3D point clouds to derive  
98 inflorescence-related traits, and (c) use the derived traits to monitor growth dynamics of developing  
99 inflorescence and distinguish inherent genetic and morphological diversity in crop species.

100         However, it is challenging to perform 3D reconstruction of rice panicles to achieve our objectives.  
101 First, a rice panicle is often occluded by other plant components such as leaves and other panicles.  
102 Therefore, the existing solutions by moving cameras [42] are not entirely suitable to generate un-occluded  
103 images for a panicle. Second, a panicle is non-rigid and typically is not located in the center of a plant,  
104 making it difficult to apply the existing solutions based on plant rotation [42]. Third, rather than destructive  
105 methods [22], non-destructive methods are needed to keep a panicle alive, as the growth dynamics of a  
106 panicle is of interest in this study. Fourth, the size of a panicle is relatively marginal, and the depth-camera  
107 based solutions [34] may not provide sufficient resolutions to capture the 3D details of a panicle.

108         To address these challenges, we developed an *in-house Panicle Imaging Platform* (PI-Plat) to  
109 capture the dynamics of developing panicles in rice from a range of genetically diverse rice genotypes. A  
110 panicle is isolated to generate un-occluded images in a non-destructive manner. In addition, a panicle stays  
111 still at the center in the PI-Plat and cameras rotate around it, thus minimizing the vibration and allowing  
112 generation of a more stable 3D point cloud. The resolution of the cameras is ensured to capture details of a  
113 panicle in 2D images, leading to high-resolution 3D reconstruction results. A total of 11 genotypes, *indica*  
114 and *japonica* sub-populations were selected. Post fertilization, primary panicles were imaged on a weekly  
115 basis (week 1, 2, and 3) by using the PI-Plat. The captured images were used for 3D reconstruction to  
116 extract digital phenotypic attributes: voxel count and color intensity. We reported increased sensitivity in  
117 panicle trait prediction from 3D reconstruction when compared to direct end-point measurements of yield  
118 components. Although the PI-Plat is designed for rice panicles, it can be extended for other small plant  
119 components such as new branches or leaves for cereals.

120

121

## 122 **Material and methods**

### 123 **Plant material**

124 Surface-sterilized seeds of 11 rice accessions were germinated on half strength Murashige and Skoog media  
125 for 3 days in dark, followed by a day in light (list of the genotypes used in the study; Additional File 1).  
126 Initially, two uniformly germinated seedlings were transplanted to a 4-inch square shaped pot filled with  
127 pasteurized field soil. Throughout the growing season, the pots were maintained in standing water. After  
128 10 days of transplanting, seedlings were thinned to retain one plant per pot per genotype.

129

### 130 **Temperature treatment**

131 Plants were grown under control conditions (16-hour light and 8-hour dark at  $28\pm 1^\circ\text{C}$  and  $23\pm 1^\circ\text{C}$ ) till  
132 anthesis. One day after 50% of the primary panicle completely fertilized, half of the plants from each  
133 genotype were transferred to greenhouse having high night-time temperature (HNT; 16-hour light and 8-  
134 hour dark at  $28\pm 1^\circ\text{C}$  and  $28\pm 1^\circ\text{C}$ ). HNT treatment was maintained until maturity. Two or three replicates  
135 per treatment per genotype from the current set were used to establish image-based phenotyping workflow  
136 (Figure 1).

137

### 138 **PI-Plat: Panicle Imaging Platform**

139 We constructed a low-cost *Panicle Imaging Platform* (PI-Plat) to capture the growth parameters of rice  
140 panicles after flowering (Additional File 2). The PI-Plat is comprised of three main parts: (i) a customized  
141 wooden chamber with black interior, (ii) a rotating imaging system, and (iii) color checkerboards.

142

#### 143 *Customized wooden chamber and rotating imaging system*

144 To host the PI-Plat, a wooden chamber (height: 75-inch, width: 52.5-inch, length: 55-inch) was customized  
145 (Additional File 2). The interior of the chamber was painted black to reduce the light interference and  
146 increase the quality of image segmentation during the image processing procedure. Inside the chamber, a  
147 circular wooden board (diameter: 37-inch) having an aperture at its center was fixed at a height of 52.5-  
148 inch. The top surface of the circular wooden board was painted black as well. For imaging, plants were  
149 placed under the circular wooden board, and the panicle of interest (primary panicle) was gently passed  
150 through the aperture. To adjust for variable plant height, we used an electric scissor lift table (Additional  
151 File 2). A metal hook attached to the ceiling of the circular wooden chamber was adhered to top of the  
152 panicle for stabilizing the panicle (Additional File 2).

153 Also, a rotary double-ring apparatus having an inner and an outer ring is fixed on top of the circular  
154 wooden board (Additional File 2). A 24-inch aluminum-based outer ring with snow-ball bearings is used  
155 to hold two Sony  $\alpha 6500$  cameras for imaging and LED lights (ESDDI PLV-380, 15 Watt, 5000 LM, 5600K)

156 for light source, which undergo a 360° rotation around the panicle. The rotation is controlled by an electric  
157 motor system. The rotary double-ring apparatus has three major parts: (a) a toothed wheel connected to the  
158 electric motor, (b) a small smooth pulley and a cylindrical sleeve used to adjust tension in the belt, and (c)  
159 a rotatable ring apparatus that rotates the cameras where the outer ring is covered with a toothed belt. Our  
160 camera selection is based on high sensitivity and high stabilization to reduce image distortion during camera  
161 motion. The camera also supports customized applications for remote-controlled imaging. We utilized the  
162 camera's time-lapse feature to capture multiple images at the rate of one image per second. Sixty images  
163 were captured by each camera per minute, and in total 120 images were taken for each panicle for each  
164 time-point and treatment. For labeling, we used quick response (QR) codes as plant identifiers (IDs), which  
165 were tagged to the primary panicle. Plant IDs were generated from the images of during the later imaging  
166 processing stage. The PI-Plat were constructed mostly using commercial off-the-shelf components at a  
167 comparably low cost.

168

#### 169 *Color checkerboards*

170 Color checkerboards printed on white letter-size papers were pasted on all four sides of wooden chamber  
171 and on the top surface of the circular wooden board (Additional File 2). Each checkerboard included 20 ×  
172 20 squares (1 cm<sup>2</sup>) with colors that were randomly generated in the RGB color space. Color checkerboards  
173 were used to provide additional feature points in the 3D reconstruction process. These feature points were  
174 used to recover camera parameters, which included the intrinsic calibration (i.e., radial distortion of the lens  
175 and the focal length) and the extrinsic calibration (i.e., the position and orientation of the camera) [37].  
176 These additional feature points were important for generating a stable 3D point cloud because the panicle  
177 itself had a relatively uniform color and similar patterns, which might not provide enough feature points for  
178 the 3D reconstruction without a color checkerboard.

179

#### 180 **Image Acquisition**

181 The supplementary video shows image acquisition process using the PI-Plat (Additional File 3). To capture  
182 the growth dynamics of panicles, we performed non-destructive imaging of primary panicle corresponding  
183 to control and HNT treated plants at one (W1), two (W2) and three-weeks (W3) post-fertilization.

184

#### 185 **Image Processing**

##### 186 *3D point cloud reconstruction*

187 For 3D point cloud reconstruction, we used the MVE pipeline [37]. First, we converted all the RGB (red,  
188 green, and blue) images into the HSV (hue saturation value) space. Then, the background in all images (i.e.,  
189 the part corresponding to the walls and the circular wooden board) was segmented [43] and removed using

190 the same threshold. With the removal of the background, the amount of feature points in the 3D  
191 reconstruction process, as well as the computation time, was reduced. Since all images were taken in the  
192 PI-Plat chamber with a constant light, the same threshold worked optimally for all the panicles. Multiple  
193 tests using the ‘*colorthresholder*’ application in Matlab showed that the background can be effectively  
194 removed if hue, saturation, and value were controlled in the ranges of 0.2-0.5, 0.5-1, and 0.2-0.7,  
195 respectively. After background removal, denoising on the images was performed and the components that  
196 did not belong to a panicle (e.g., the turntable ring, the residues of checkerboards, etc.) were considered as  
197 noise and removed. These pre-processed images were used to reconstruct the 3D point clouds for each  
198 panicle at a given time-point. For this, the corresponding feature points in images were detected and  
199 matched to form a sparse point cloud in an incremental SfM process. Then, depth maps were reconstructed  
200 for each view and merged into a dense point cloud.

201

#### 202 *Trait extraction using 3D point cloud*

203 Once a point cloud at each time point was generated, we were able to extract traits of interest from the  
204 reconstructed 3D structure of panicles from these time-varying point clouds. First, each point cloud was  
205 segmented into different components (such as a panicle, the color checkboards, and the rotary double-ring  
206 apparatus) by leveraging their distinct positions or colors. For example, the color checkboards were  
207 approximately located on the boundaries (i.e., the locations of walls and the top surface of the circular  
208 wooden board) of a point cloud, and the metal hook was located at the top of the point cloud and has a gray  
209 color. Second, the point clouds need to be scaled and aligned, as different point clouds may have different  
210 scales and orientations after reconstruction. In this work, the geometries of the color checkboards and the  
211 rotary double-ring apparatus were constant during imaging acquisition. Thus, we scaled and aligned the  
212 color checkboards and the apparatus across the point clouds. In this way, the rest of the point clouds were  
213 scaled and aligned as well, such that panicles in different point clouds can be compared at the same scale  
214 [44]. Third, each point cloud was voxelized for volume quantification [45]. The same bounding box was  
215 employed to enclose each point cloud. The bounding box was cube-shaped and aligned across the point  
216 clouds with respect to the color checkboards and the apparatus. Then, an equivalent discrete voxel-based  
217 grid was generated. The grid size was obtained by dividing each edge of the bounding box by 1000. Thus,  
218 a volume with a resolution of  $1000 \times 1000 \times 1000$  was generated to sample the 3D space. Finally, the  
219 points not belonging to a panicle were removed. Therefore, some voxels were filled with a group of panicle  
220 points and the other voxels were empty. For each filled voxel, we computed the average color (i.e., RGB)  
221 intensity of the points contained in the voxel. Subsequently, the following features were extracted from a  
222 volume: (a) voxel count: the number of the filled voxels, and (b) color intensity: the sum of color intensities  
223 of all filled voxels.



224

### 225 *2D pixel count extraction from multi-view images of developing panicles*

226 For a comparison purpose, conventional 2D based image analysis of panicles was also employed.  
227 Specifically, the total pixel count of a panicle was calculated from its corresponding 120 images captured  
228 from multiple views. To achieve this, first, each pre-processed image was segmented using the  
229 ‘*colorthreshold*’ application in Matlab. This resulted in a set of separated regions. Second, because the  
230 checkerboards used in our experiment had green squares whose color was similar to a panicle, the square-  
231 shaped regions were detected using solidity. For each region, its solidity is defined as the ratio of the  
232 region’s area to the region’s convex hull area. The solidity of each region was calculated using the  
233 ‘*regionprops*’ function in Matlab. We did not account for regions that had solidity values larger than 0.7.  
234 In addition, given the relatively marginal size of a panicle, a region larger than certain pixels (800 pixels in  
235 our study) was filtered out. Therefore, only the pixels of the panicle remained, and the pixel count of the  
236 panicle in an image was calculated. We summed the pixel count obtained from each of the 120 multi-view  
237 images of the panicle as the total pixel count.

238

### 239 **Scanning of Mature Panicles using Flatbed Scanner**

240 Next, we analyzed mature primary panicle to gain ground truth and derive features, which were compared  
241 with the developing panicle. For this, the primary panicles were harvested, and scanned images were  
242 obtained using an Epson Expression 12000 XL scanner (600 dpi resolution). Branches on primary panicles  
243 were carefully spread out to avoid overlaps in the scanned images. These scanned images were used to  
244 extract the following traits: projected surface area of the primary panicle, projected seed count of the  
245 primary panicle, average of major (seed length) and minor (seed width) axis, and area of the individual seed  
246 on the primary panicle. In this set of images, the panicles were placed over black background. We  
247 segmented the panicles from the background using color thresholding and obtained the binary images. As  
248 a panicle was mostly yellowish in color and the background was black, an image was transformed in the  
249 HSV color space to segment the panicle (setting for range: hue 0-0.3, saturation 0.2-1, and value 0.5-1). In  
250 principle, a harvested mature panicle has all the seeds attached to the rachis. Therefore, we first used  
251 morphological opening [46] to process the images. As the branches were relatively thin and the seeds were  
252 relatively thick, most regions of the seeds were disconnected from each other after morphological opening  
253 by removing the branch pixels. As the seeds have an oval shape, the regions that were too thin were  
254 removed. The remaining regions corresponded to seeds. The length, width, and area of a seed was calculated  
255 from its region using the ‘*regionprops*’ function in Matlab.

256

257



## 258 **Manual Phenotyping of the Mature Panicle**

259 Next, we manually measured the yield traits on mature primary panicle after harvesting. For this, we  
260 collected data for (a) total seed weight, (b) total seed number, (c) weight per seed, and (d) number of fertile  
261 and sterile seeds to calculate percentage fertility.

262

## 263 **Correlation Analysis**

264 For pairwise correlation analysis, the 3D reconstruction-based features (voxel count and color intensity)  
265 and the total pixel count (2D) derived from the multi-view images of developing panicle were compared  
266 with end-point measurements at maturity. For the end-point measurements, the traits derived from flatbed  
267 scanned images as well as manual measurements from the primary panicle at maturity were considered.  
268 These traits were collected from 11 rice genotypes with two to three replicates per genotype and per  
269 treatment (control and HNT). A total of 55 observations were used for Pearson correlation analysis. The  
270 correlation analysis was performed using R v. 3.4.3 [47] and RStudio v.1.1.419 [48]. Correlation matrices  
271 containing Pearson correlation coefficients and p-values were obtained using the `rcorr` function in  
272 “Hmisc” package [49]. Matrix displaying correlation between selected traits was plotted using  
273 `chart.Correlation` in the “PerformanceAnalytics” package [50]. Both the raw data and the complete  
274 correlation matrix are provided (Additional File 4 and 5).

275

## 276 **Data Accessibility**

277 The text-based raw data generated from 3D reconstruction-based approach, flatbed scanner, and manual  
278 measurements for this work is provided as additional files with this submission. Raw image data is large  
279 and hence only part of them is shared for user testing on a UNL Box repository  
280 (<https://unl.box.com/s/g0bof1mpfp33hn66b2qabr9kiwmhbzv>).

281

282

## 283 Results

### 284 Workflow of PI-Plat

285 Evaluation of inflorescence-related parameters is limited by traditional phenotyping methods. Advances in  
 286 plant phenotyping methodology have enhanced our understanding of vegetative organs and overall plant  
 287 structures. However, we still need to capitalize on the technological advancement in optics, computer  
 288 vision, and software design, to capture complex plant structures. In this study, we developed a *Panicle*  
 289 *Imaging Platform* (PI-Plat) to understand yield-related parameters by reconstructing 3D space to derive  
 290 digital traits (Additional File 2).

291 For method validation, we used 11 rice genotypes, from the *indica* and *japonica* rice sub-  
 292 populations (Additional File 1). Once 50% of primary panicle underwent flowering, a subset of plants was  
 293 maintained under control conditions and the rest were moved to a greenhouse with high night temperature  
 294 (HNT) condition [51]. The motivation for HNT treatment is to explore the phenotypic variation in rice  
 295 germplasm as rice grain development is known to be sensitive to HNT [52–54]. The primary panicles from  
 296 each plant and treatment were imaged three times on a weekly basis (week 1, 2, and 3) using the PI-Plat.  
 297 For imaging, two visible cameras, held at two different positions, were employed on a rotating imaging  
 298 system. Sixty images per camera, corresponding to an image clicked every six degrees, aided in capturing  
 299 multiple views covering 360° of the panicles (Additional File 3). In total, 19,800 images were captured for  
 300 the 11 genotypes. Each panicle image was segmented and used to reconstruct 3D point clouds which were  
 301 used to extract phenotypic traits such as (i) voxel count and (ii) color intensity (Figure 1 and Table 1).

302

| Phenotyping                                             | Analysis method                                         | Traits extracted                  | Description                                                                                              |
|---------------------------------------------------------|---------------------------------------------------------|-----------------------------------|----------------------------------------------------------------------------------------------------------|
| Developing Panicle (week 1, 2 and 3 post-fertilization) | Reconstruction of 3D point cloud from multi-view images | Voxel count                       | Total number of points in 3D reconstructed point cloud, which can be used to estimate the overall volume |
|                                                         |                                                         | Color sum – R, G, B               | sum of color intensities of signals from R, G, and B channels.                                           |
|                                                         |                                                         | Color intensity – ratio of R to G | Ratio of intensity in red channel and the intensity in green channel                                     |
|                                                         | Multi-view 2D image analysis                            | Pixel count                       | Total pixel counts to estimate 2D surface area of the panicle                                            |
| Mature Panicle                                          | Single-view conventional 2D scanning                    | Projected seed count              | Estimation of total number of seeds                                                                      |
|                                                         |                                                         | Projected surface area            | Estimation of total surface area                                                                         |
|                                                         |                                                         | Seed area                         | Mean area of all seeds                                                                                   |
|                                                         |                                                         | Seed major and minor axis length  | Mean major and minor axis length of all seeds                                                            |
|                                                         | Manual measurement                                      | Yield-related traits              | Total number of seeds, total seed weight, fertility and weight per seed                                  |

303 Table 1: Overview of the phenotyping methodology and trait derived from the corresponding methods in the study.  
 304 R, Red; G, Green; B, Blue. n, normalized.

305

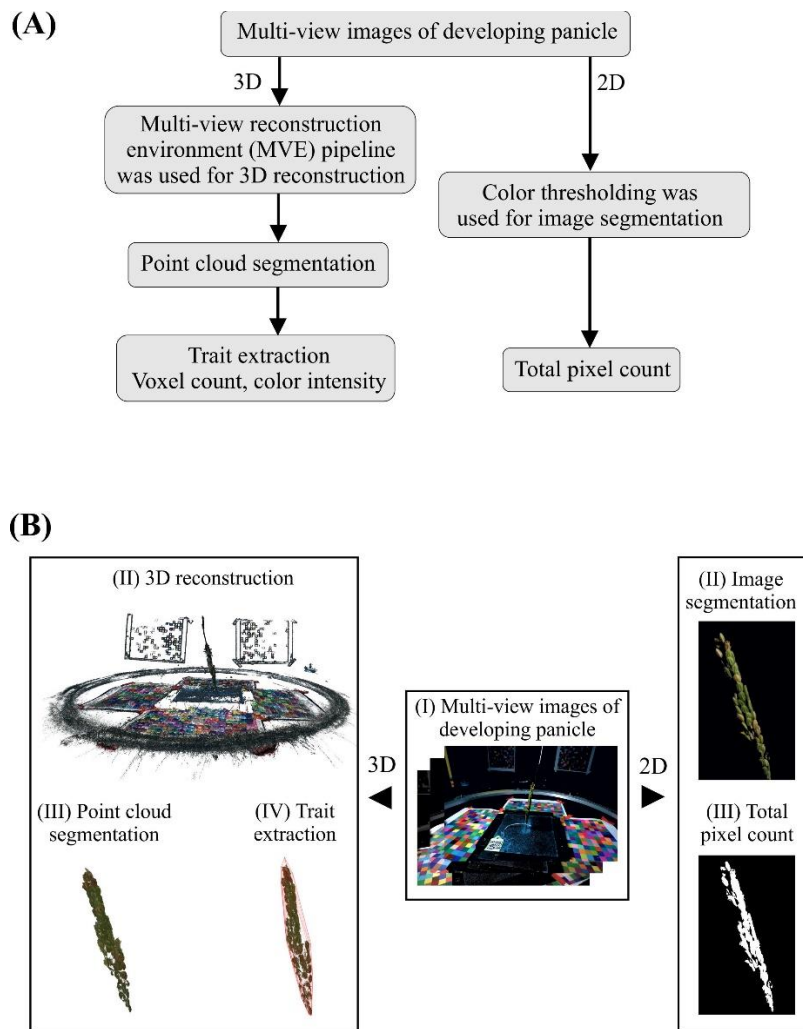

306

307 **Figure 1: Multi-view image analysis of developing panicle using PI-Plat.** (A) Flowchart and (B) graphical  
308 representation of the multi-view image analysis using 3D reconstruction and 2D approach.

309

### 310 **Correlation between traits derived from multi-view images of developing panicle and yield related** 311 **components at maturity**

312 First, we aimed to determine if the traits derived from 3D reconstruction of the developing panicle correlate  
313 with the yield related components at maturity. For this, the 3D reconstruction-based point cloud features  
314 derived from multi-view images (voxel count, color intensity) were compared to end-point measurements  
315 of the mature panicle (Additional File 5). The end-point measurements correspond to (i) flatbed scanned  
316 images (projected surface area at the panicle level, projected seed count, and morphometric measurements  
317 at individual seed level; seed area, seed length and width) and (ii) manual measurements (total seed weight,  
318 seed number, weight per seed, and fertility) of the mature panicle. Among all the traits derived from 3D  
319 reconstruction, only voxel count of developing panicle exhibited significant positive correlation with

320 projected surface area ( $r_{w1}, r_{w2}, r_{w3}$ ; 0.64, 0.55, 0.82), total seed weight ( $r_{w1}, r_{w2}, r_{w3}$ ; 0.48, 0.50, 0.74) and  
 321 seed number ( $r_{w1}, r_{w2}, r_{w3}$ ; 0.67, 0.61, 0.70) at maturity (Figure 2, Additional File 5). The correlation of the  
 322 voxel count with projected surface area ( $r_{w1}$ =0.64) and total seed weight was relatively low at week 1 ( $r_{w1}$ :  
 323 0.48) and increased with later weeks, week 2 and 3 ( $r_{w1} < r_{w2} < r_{w3}$ ; Figure 2). On the other hand, the  
 324 correlation between the voxel count of a developing panicle and the seed number at maturity remained  
 325 stable (Figure 2). Notably, the color intensity derived from 3D reconstruction did not exhibit meaningful  
 326 correlation with any of the endpoint measurements (Additional File 5).  
 327

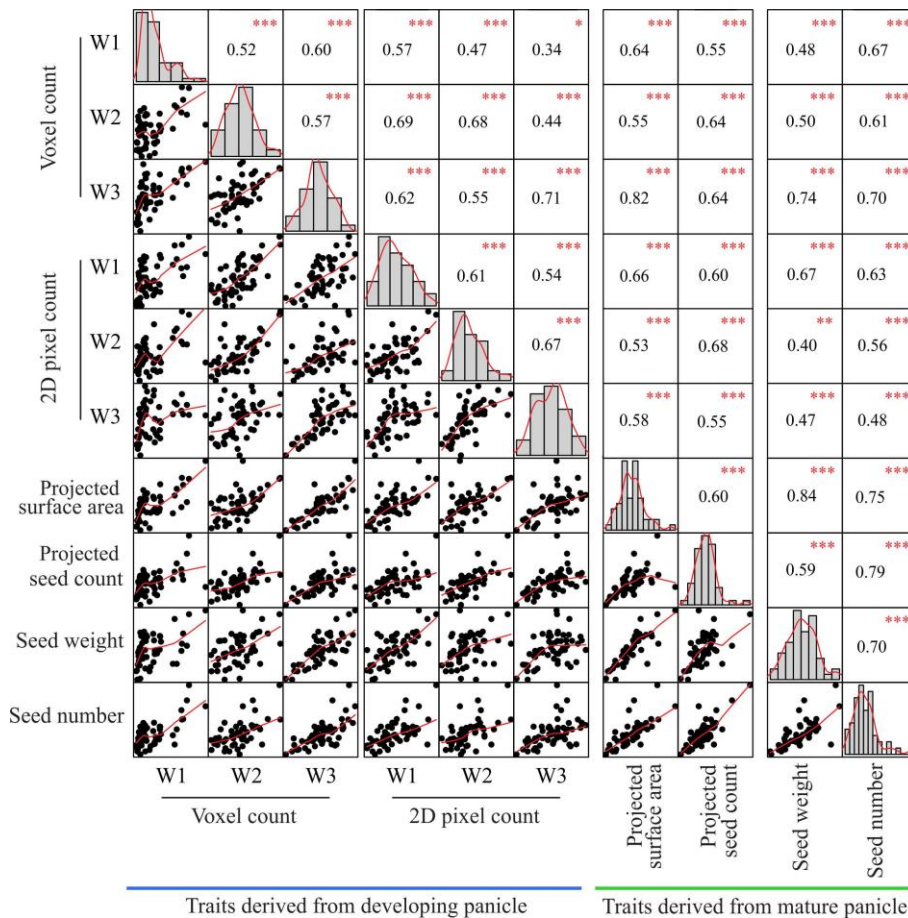

328  
 329 **Figure 2: Correlation of traits derived from 3D reconstruction, 2D scanning and manual**  
 330 **measurements of inflorescence-related traits.** Using PI-Plat, developing panicles were imaged on weekly  
 331 basis (week 1, 2, and 3). For a respective panicle, multi-view images were used for 3D reconstruction to  
 332 extract voxel count. Also, 2D pixel count was estimated for developing panicle. Phenotypic traits from  
 333 mature panicle were analyzed by flatbed scanner (projected surface area and seed count), and manual  
 334 measurements (seed number and weight). Pearson correlation analysis for traits of primary interest is  
 335 represented. Similar analysis for other extracted traits is listed in Additional File 4. Histograms and red line  
 336 represent the distribution of each trait. p-value for significant correlation is shown in red (\*\*\*)  $p < 0.001$ , \*\*  
 337  $p < 0.01$ , \*  $p < 0.1$ ,  $n = 55$ .  
 338

339 Next, the multi-view images were also used to perform the conventional 2D image analysis to  
340 extract the total pixel count of a developing panicle for week 1, 2 and 3 (Figure 1). Then, the derived traits  
341 at each week were compared with the end-point measurements (Additional File 5). Consequently, the total  
342 pixel count showed a positive correlation with all the traits derived from flatbed scanned images and manual  
343 measurements at maturity. The correlation between the total pixel count and the projected surface area as  
344 well as the total seed weight was unstable. Surprisingly, these correlations at week 3 were lower than the  
345 correlations at week 1 (Figure 2).

346

### 347 **Voxel count – an estimate for grain-filling rate**

348 Grain filling rate is the major determinant of mature crop yield. However, evaluating seed weight dynamics  
349 usually requires destructive phenotyping methods. In our study, we estimated voxel count from the 3D  
350 reconstruction of developing panicles, which represents the overall volume of a panicle, and thus accounts  
351 for grain-filling rate. In general, we observed a temporal trend of progressive increase in voxel count over  
352 three weeks during the post-fertilization period (Figure 3A). Under control conditions, voxel counts at W2  
353 and W3 were significantly higher than the one at W1, while no significant difference was observed between  
354 W2 and W3 (Figure 3A). These results indicate that substantial gain in overall seed volume occurs before  
355 W2. Interestingly, plants treated with HNT, possessed significantly higher voxel count at W1 compared to  
356 control. These differences dissipated at W2 and W3, as no significant differences between control and HNT  
357 treated plants were observed (Figure 3A).

358 Next, we evaluated the weekly voxel count for individual genotypes grown under control and HNT  
359 stress conditions (Figure 3B and C). We performed hierarchical clustering based on voxel count for control  
360 condition panicles (Figure 3B). The analyses grouped 11 genotypes into four distinct clusters (Figure 3B  
361 and D). Cluster I was comprised of 301341, 301052, and 301220, cluster II: 301183, 301105, 301278,  
362 301279, and 301221, cluster III: 301260 and 301262, and, while cluster IV constituted only one genotype,  
363 301261 (Figure 3C). Interestingly, the 4/5 genotypes in Cluster II (301183, 301105, 301221, 301279)  
364 showed a significant gain in voxel count between W1 and W2 (Figure 3C). For genotypes in Clusters I, III,  
365 and IV, the voxel count trend did not show any significant difference between W1, W2 and W3 (Figure  
366 3C).). This could be because these genotypes may have already gained their potential seed size by W1, and  
367 thereby only incremental changes occur afterwards.

368

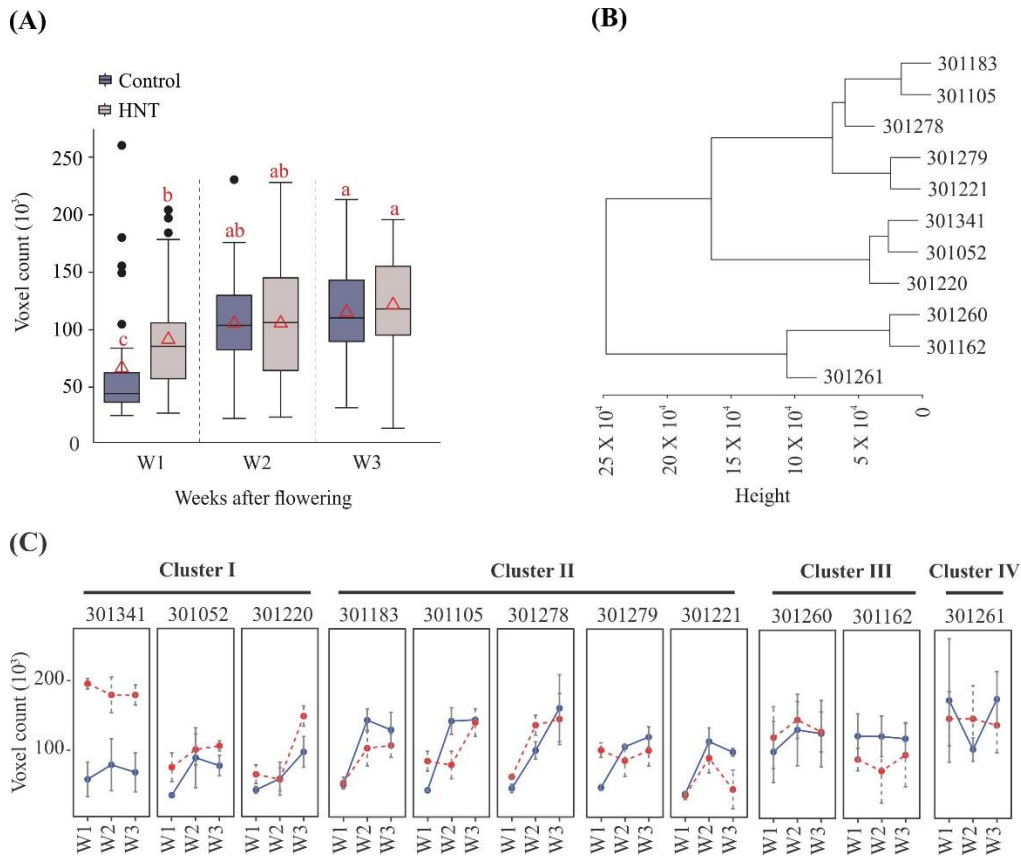

369

370 **Figure 3: Estimation of voxel count.** Voxel count derived from 3D point cloud represents overall volume  
 371 of developing panicle. **(A)** Average voxel counts from all genotypes for a respective treatment (control and  
 372 HNT) and time-point (week 1, 2, and 3) is shown. Box plot represents range, median and mean (red triangle)  
 373 for the same. Means connected with similar letter are not significantly different from each other (Student's  
 374 t-test;  $p < 0.1$ ). **(B)** Hierarchical clustering analysis of genotypes based on their voxel count in control  
 375 conditions. **(C)** Voxel count for individual genotypes corresponding to cluster I-IV. Y-axis represent voxel  
 376 count, x-axis indicate time-point (week 1, 2, and 3). C: control, HNT: high night temperature. Box plot  
 377 represents range, median and mean (red triangle) for the same. Means connected with similar letter are not  
 378 significantly different from each other (Student's t-test;  $p < 0.1$ ).  
 379

### 380 Color intensity – an estimate for rate of maturation

381 Rate of panicle maturation is a well-studied trait that directly impacts final yield [55, 56]. Heat stress  
 382 impacts rice seed development and hence alters the panicle maturation rate [57, 58]. Therefore, evaluating  
 383 the dynamic of panicle maturation could be potentially useful in determining the dynamic of stress response  
 384 in rice. However, evaluation of the respective traits is done by conventional phenotyping methods, which  
 385 are inherently laborious and subjective. To estimate the panicle maturation dynamics, we extracted intensity  
 386 of the RGB channels from the 3D point cloud. Then, we used the ratio of intensity from R to G channels to  
 387 estimate the yellowness of developing panicle, which increases as the panicles mature. We observed a  
 388 temporal trend indicating an increase in the ratio of R to G from W1 to W3 (Figure 4A). This observation  
 389 is consistent with the progression of panicle maturation as its color changes from green to yellow.



390 Interestingly, the R to G ratio was significantly higher for plants treated with HNT compared to control,  
 391 suggesting that HNT accelerates the rate of panicle maturation. We next explored the genotypic differences  
 392 for maturation rate (Figure 4B). We observed consistent increase in the R to G ratio from W1 to W3 under  
 393 control and HNT (Figure 4B). The R to G ratio for majority of genotypes was significantly higher for HNT  
 394 treated plants than control (Figure 4B and Additional File 5).  
 395

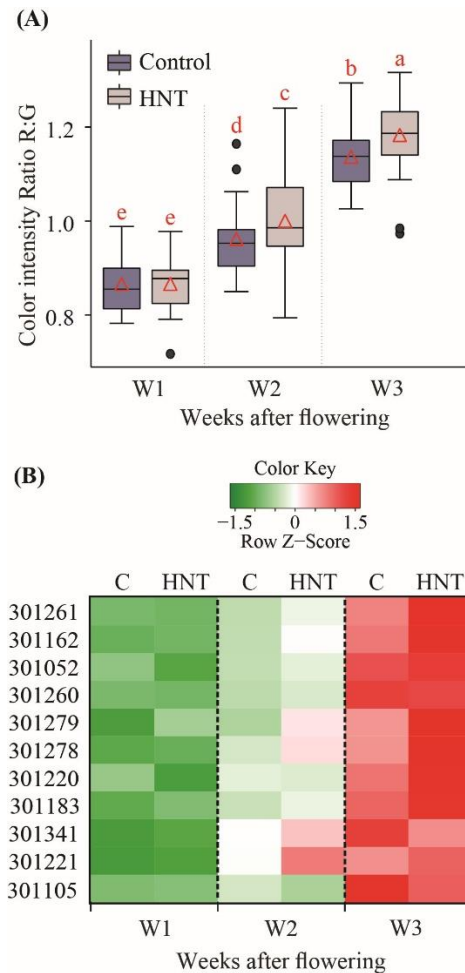

396

397 **Figure 4: Estimation of color intensity.**

398 Color intensity represents sum of color intensities of signals from red (R), green (G), and blue (B) channels.  
 399 (A) Average ratio of R to G intensities from all genotypes for a respective treatment (control or HNT) and  
 400 time-point (week 1, 2, and 3) is shown. Box plot represents range, media and mean (red triangle) of the R  
 401 to G ratio. Means connected with same letter are not significantly different from each other (Student's t-  
 402 test;  $p < 0.1$ ). (B) Heat map of R to G ratio for different genotypes under control and HNT.  
 403



## 404 **Discussion**

405 With the recent advances in automated plant image acquisition, accurate quantification of phenotypic traits  
406 has become the focal point for realizing the potential of plant phenomics. The primary focus of automated  
407 phenotyping platforms has been on the vegetative growth and development and to some extent on the root  
408 architectural traits [53–55 and references therein]. Only limited effort has been directed towards more  
409 complex yield related traits such as IA in greater detail [16, 20–22, 28, 62]. After flowering, inflorescence  
410 undergoes dynamic changes, such as grain filling and maturation, which significantly contributes towards  
411 the final yield in cereals. Previous attempts to capture inflorescence-related traits have been limited to end-  
412 point measurements. Further, automated Lemnatech phenotyping system, which is mainly used for whole  
413 plant imaging, is not suitable to extract high-resolution data from the inflorescence. Hence, the major goal  
414 of this study was to capture the growth and developmental dynamics of inflorescence architecture (IA) at  
415 high-resolution in rice. To this end, we have developed a low-cost effective system ‘PI-Plat’ to comprehend  
416 multi-dimensional features of IA (Figure 1). One of the main novelties of the PI-Plat is that it is designed  
417 to reconstruct 3D models of smaller plant parts, in this study ‘panicle’, with a very high resolution. Also,  
418 compared to the widely used turntable imaging system where cameras rotate [63], the panicle is fixed at the  
419 center of the PI-Plat, thus the vibration is avoided, and the 3D point cloud has less noise. This imaging  
420 system can be used to image the panicles in a non-destructive manner, which provides an opportunity to  
421 perform temporal phenotyping of the same panicle at consequent developmental stages. On similar basis,  
422 rice developing panicles were imaged on weekly basis after fertilization to capture growth dynamics. The  
423 multi-view images of developing rice panicle were used for 3D reconstruction, which enabled us to capture  
424 digital traits, such as voxel count and color intensity.

425 We found that the 3D reconstruction-based feature – voxel count has a positive correlation with  
426 seed number and total weight at maturity. Panicle development after fertilization involves change in seed  
427 weight and volume, but seed number remains constant. Consequently, we observed the temporal trend for  
428 correlation of voxel count with final seed weight but not with seed number (Figure 2). Our correlation  
429 analysis signifies that image-based phenotyping of developing panicles can be used to estimate the final  
430 yield outcome. This information can be valuable for elucidating the physiological and genetic basis of yield  
431 components in rice. Various yield components are determined by numerous genes and pathways, which  
432 likely influence the yield traits at different developmental phases during panicle development. By using the  
433 3D reconstruction-based voxel count during the panicle development, researchers can identify phenotypic  
434 variation over time for divergent genotypes, hence increase the mapping resolution for linking genotypes-  
435 to-phenotype. Furthermore, relatively stable correlation between voxel count and seed number at maturity  
436 suggest that image-based phenotyping after fertilization can be used to estimate final seed number. In  
437 contrast, the 2D based total pixel count of developing panicle showed relatively lower and unstable

438 correlation with seed number and total seed weight at maturity (Figure 2). Interestingly at W3, 2D based  
439 pixel counts had lower correlation with endpoint measurements than voxel counts. For instance, the  
440 correlation of voxel count with projected surface area and total seed weight was 0.82 and 0.74, respectively,  
441 while the correlation of 2D pixel count with projected surface area and total seed weight was 0.58 and 0.47,  
442 respectively. This could be due to the limitation of using convention 2D-based phenotyping to completely  
443 capture the growth and color dynamics of developing rice seed. Since voxel count positively correlates with  
444 final weight, it can be used to capture the weight or volume dynamics. We observed an increase in voxel  
445 count from W1 to W3, which is directly related to the increase in size and volume of developing seeds. In  
446 context of panicle development, it accounts for rate of grain-filling. Significant gain in the voxel count was  
447 achieved by W2 suggesting that substantial seed volume is attained by week 2 (Figure 3). This observation  
448 holds true for 4/11 genotypes, while the other seven genotypes do not show such any significant difference  
449 between W1, W2, and W3. One possible explanation could be that these genotypes might have accelerated  
450 increase in panicle volume and/or seed weight by W1; thus, exhibiting incremental changes during the  
451 subsequent two weeks. We observed higher voxel count for HNT treated plants compared to control plants  
452 at W1 (Figure 3A). Surprisingly, these differences dissipated at W2 and W3, and no significant difference  
453 was observed at maturity. These results highlight the importance of temporal phenotyping relative to single  
454 time point measurements. Thus, an end-point measurement approach is not practical to identify and hence  
455 map traits that are not persistent at maturity. Since, rice and most other grain crops such as wheat and maize  
456 are generally more sensitive to environmental stresses, such as heat and drought, the approach of capturing  
457 dynamic reproductive traits in a non-destructive manner will be valuable for research aimed at improving  
458 yield resilience to environmental stresses. Early detection of transitory phenotypes/traits is also valuable  
459 for molecular studies. Measurement of color intensities from 3D point cloud aided us in understanding the  
460 dynamics of panicle maturation for diverse genotypes. Notably, panicles from HNT treated plants showed  
461 significantly higher R: G indicating that HNT plants undergo faster maturation. These traits derived from  
462 3D reconstruction of multi-view images provided a close approximation of structural features of the  
463 developing rice panicle.

464 To harness the full potential of the existing genetic resources, we need to bridge the gap between  
465 genotype and phenotype. In this context, high throughput genotyping has been facilitated by development  
466 of low-cost sequencing platforms. However, accurate and efficient phenotyping of large-scale populations  
467 is a major bottleneck for crop improvement. The emergence of phenotyping platforms specifically targeting  
468 inflorescence-related traits promise close approximation of the yield-related parameters. PI-Plat provides  
469 an important first step towards achieving higher spatial and temporal resolution in IA phenotyping without  
470 destructive sampling. The next step towards achieving high-throughput phenotyping of IA traits is the  
471 automation for enabling researchers to develop genotype-to-phenotype linkages. Although, the 3D derived

472 voxel count, and color intensity developed as part of PI-Plat can be used to screen large populations  
473 elucidating phenotypic variability in inflorescence-related traits, it is still a laborious task given the lack of  
474 automation. In summary, PI-Plat-derived 3D traits fills a significant gap in the plant phenotyping toolbox  
475 by providing greater spatial and temporal sensitivity of capturing dynamic inflorescence traits, especially  
476 for studying abiotic stress responses during reproductive development.

477

#### 478 **Abbreviations**

479 IA: inflorescence architecture, PI-Plat: panicle imaging platform, 3D: 3 dimensional, 2D: 2 dimensional,  
480 HNT: high night temperature, W1/2/3: one/two/three week after flowering, RGB: red, green, and blue.

481

#### 482 **Authors' Contribution**

483 HW, HY, YG, PS, and PP conceived and designed the experiment. PP, JS, BKD, FZ, and TG performed  
484 the experiments. FZ and TG performed imaging data analysis. PP and JS analyzed the results and wrote the  
485 manuscript. All authors read and approved the manuscript.

486

#### 487 **Acknowledgements**

488 We thank Martha Rowe for the help with scanning of mature panicles and seeds.

489

#### 490 **Availability of data and material**

491 Due to the relatively large size of the raw data, only part of them is shared on a UNL Box repository  
492 (<https://unl.box.com/s/g0bof1mpfp33hn66b2qabr9kiwmhbzv>). The raw images used for 3D  
493 reconstruction and manual phenotyping dataset used in this study is available from the corresponding author  
494 on request.

495

#### 496 **Consent for publication**

497 Not applicable.

498

#### 499 **Ethics approval and consent to participate**

500 Not applicable.

501

#### 502 **Competing interests**

503 The authors declare that they have no competing interests.

504

#### 505 **Funding**

506 This work was supported by National Science Foundation Award # 1736192 to HW and HY.

507

508 **Additional Files** (Additional data is available online)

509 Additional File 1: Genetic and geographical information of the rice genotypes used in the study.

510 Additional File 2: PI-Plat and its components.

511 Additional File 3: Video showing PI-Plat in motion.

512 Additional File 4: Raw data collected from developing (imaging derived) and mature (manual  
513 measurements) panicles.

514 Additional File 5: Pearson correlation analysis for all the traits derived from 3D reconstruction and multi-  
515 view 2D-pixel count analysis of developing panicle (yellow color coded), and mature panicle derived traits  
516 from 2D scanning and manual measurement (green color coded). Significant correlation values (p value <  
517 0.05) are highlighted in red font.

518 Additional File 6: Average intensities of (A) red and (B) green channels from all genotypes for a respective  
519 treatment (control and HNT) and time-point (week 1, 2, and 3).

520 **References:**

- 521 1. Tester M, Langridge P. Breeding technologies to increase crop production in a changing world. *Science*  
522 (80- ). 2010;327:818–22. doi:10.1126/science.1183700.
- 523 2. Alexandratos N, Bruinsma J. *World Agriculture towards 2030/2050: the 2012 revision*. 2012.  
524 [www.fao.org/economic/esa](http://www.fao.org/economic/esa).
- 525 3. Röth S, Paul P, Fragkostefanakis S. Plant heat stress response and thermotolerance. 2016. doi:  
526 10.1007/978-81-322-2662-8\_2
- 527 4. Ray DK, Mueller ND, West PC, Foley JA. Yield Trends Are Insufficient to Double Global Crop  
528 Production by 2050. *PLoS One*. 2013;8:e66428. doi:10.1371/journal.pone.0066428.
- 529 5. Godfray HCJ, Beddington JR, Crute IR, Haddad L, Lawrence D, Muir JF, et al. Food security: the  
530 challenge of feeding 9 billion people. *Science* (80- ). 2010;327:812–8. doi:10.1126/science.1185383.
- 531 6. Foley JA, Ramankutty N, Brauman KA, Cassidy ES, Gerber JS, Johnston M, et al. Solutions for a  
532 cultivated planet. *Nature*. 2011;478:337–42. doi:10.1038/nature10452.
- 533 7. Richards RA. Selectable traits to increase crop photosynthesis and yield of grain crops. *J Exp Bot*.  
534 2000;51 suppl\_1:447–58. doi:10.1093/jexbot/51.suppl\_1.447.
- 535 8. Evans LT, Fischer RA. Yield Potential: Its definition, measurement, and significance. *Crop Sci*.  
536 1999;39:1544. doi:10.2135/cropsci1999.3961544x.
- 537 9. Doust A. Architectural evolution and its implications for domestication in grasses. *Ann Bot*.  
538 2007;100:941–50. <https://academic.oup.com/aob/article-abstract/100/5/941/135949>. Accessed 14 Mar  
539 2019.
- 540 10. Duan L, Yang W, Huang C, Liu Q. A novel machine-vision-based facility for the automatic  
541 evaluation of yield-related traits in rice. *Plant Methods*. 2011;7:44. doi:10.1186/1746-4811-7-44.
- 542 11. Reuzeau C, Pen J, Frankard V, Wolf J, Peerbolte R, Broekaert W, et al. TraitMill: a discovery engine  
543 for identifying yield-enhancement genes in cereals. *Plant Gene Trait*. 2010;1.  
544 <http://biopublisher.ca/index.php/pgt/article/html/53>.
- 545 12. Granier C, Aguirrezabal L, Chenu K, Cookson SJ, Dauzat M, Hamard P, et al. PHENOPSIS, an  
546 automated platform for reproducible phenotyping of plant responses to soil water deficit in *Arabidopsis*  
547 *thaliana* permitted the identification of an accession with low sensitivity to soil water deficit. *New Phytol*.  
548 2006;169:623–35. doi:10.1111/j.1469-8137.2005.01609.x.
- 549 13. Golzarian MR, Frick RA, Rajendran K, Berger B, Roy S, Tester M, et al. Accurate inference of shoot  
550 biomass from high-throughput images of cereal plants. *Plant Methods*. 2011;7:2. doi:10.1186/1746-4811-  
551 7-2.
- 552 14. Yang W, Xu X, Duan L, Luo Q, Chen S, Zeng S, et al. High-throughput measurement of rice tillers  
553 using a conveyor equipped with x-ray computed tomography. *Rev Sci Instrum*. 2011;82:025102.

- 554 doi:10.1063/1.3531980.
- 555 15. Bylesjö M, Segura V, Soolanayakanahally RY, Rae AM, Trygg J, Gustafsson P, et al. LAMINA: a  
556 tool for rapid quantification of leaf size and shape parameters. *BMC Plant Biol.* 2008;8:82.  
557 doi:10.1186/1471-2229-8-82.
- 558 16. Wilson Z, Greenberg AJ, McCouch SR, Crowell S, Falcao AX, Shah A. High-Resolution  
559 Inflorescence Phenotyping Using a Novel Image-Analysis Pipeline, PANorama. *Plant Physiol.*  
560 2014;165:479–95.
- 561 17. Yazdanbakhsh N, Fisahn J. High throughput phenotyping of root growth dynamics, lateral root  
562 formation, root architecture and root hair development enabled by PlaRoM. *Funct Plant Biol.*  
563 2009;36:938. doi:10.1071/FP09167.
- 564 18. Wang L, Uilecan I, Assadi A, ... CK-P, 2009 U. HYPOTrace: image analysis software for measuring  
565 hypocotyl growth and shape demonstrated on Arabidopsis seedlings undergoing photomorphogenesis.  
566 *Plant Physiol.* 2009;149:1632–7. <http://www.plantphysiol.org/content/149/4/1632.short>.
- 567 19. Fiorani F, Schurr U. Future Scenarios for Plant Phenotyping. *Annu Rev Plant Biol.* 2013;64:267–91.  
568 doi:10.1146/annurev-arplant-050312-120137.
- 569 20. Ikeda M, Hirose Y, Takashi T, Shibata Y, Yamamura T, Komura T, et al. Analysis of rice panicle  
570 traits and detection of QTLs using an image analyzing method. *Breed Sci.* 2010;:55–64.  
571 [https://www.jstage.jst.go.jp/article/jsbbs/60/1/60\\_1\\_55/\\_article/-char/ja/](https://www.jstage.jst.go.jp/article/jsbbs/60/1/60_1_55/_article/-char/ja/). Accessed 12 Mar 2019.
- 572 21. AL-Tam F, Adam H, Anjos A, Lorieux M, Larmande P, Ghesquière A, et al. P-TRAP: a Panicle Trait  
573 Phenotyping tool. *BMC Plant Biol.* 2013;13:122. doi:10.1186/1471-2229-13-122.
- 574 22. Zhou Y, Srinivasan S, Mirnezami SV, Kusmec A, Fu Q, Attigala L, et al. Semiautomated Feature  
575 Extraction from RGB Images for Sorghum Panicle Architecture GWAS. *Plant Physiol.* 2018;179:24–37.
- 576 23. Aquino A, Millan B, Gaston D, Diago M-P, Tardaguila J, Aquino A, et al. vitisFlower®:  
577 Development and Testing of a Novel Android-Smartphone Application for Assessing the Number of  
578 Grapevine Flowers per Inflorescence Using Artificial Vision Techniques. *Sensors.* 2015;15:21204–18.  
579 doi:10.3390/s150921204.
- 580 24. Millan B, Aquino A, Diago MP, Tardaguila J. Image analysis-based modelling for flower number  
581 estimation in grapevine. *J Sci Food Agric.* 2017;97:784–92. doi:10.1002/jsfa.7797.
- 582 25. Wang Z, Underwood J, Walsh KB. Machine vision assessment of mango orchard flowering. *Comput*  
583 *Electron Agric.* 2018;151:501–11. doi:10.1016/J.COMPAG.2018.06.040.
- 584 26. Ji W, Zhao D, Cheng F, Xu B, Zhang Y. Automatic recognition vision system guided for apple  
585 harvesting robot. *Comput Electr Eng.* 2012;38:1186–95.  
586 <https://www.sciencedirect.com/science/article/pii/S0045790611001819>.
- 587 27. Crowell S, Falcão A, Shah A, Wilson Z, Greenberg AJ, McCouch S. High-resolution inflorescence

- 588 phenotyping using a novel image-analysis pipeline, PANorama. *Plant Physiol.* 2014;165:479–95.  
589 <http://www.plantphysiol.org/content/165/2/479.short>.
- 590 28. Gage JL, Miller ND, Spalding EP, Kaepler SM, De Leon N. TIPS: a system for automated image-  
591 based phenotyping of maize tassels. *Plant Methods.* 2017;13. doi:10.1186/s13007-017-0172-8.
- 592 29. Nhung KT, Giang Khong N, Loan TH, Thu NGUYEN D, Chung MAI D, Giang HOANG T, et al. A  
593 genome-wide association study using a Vietnamese landrace panel of rice (*Oryza sativa*) reveals new  
594 QTLs controlling panicle morphological traits. *BMC Plant Biol.* 2018;18. doi:10.1186/s12870-018-1504-  
595 1.
- 596 30. Adriani DE, Dingkuhn M, Dardou A, Adam H, Luquet D, Lafarge T. Rice panicle plasticity in Near  
597 Isogenic Lines carrying a QTL for larger panicle is genotype and environment dependent. *Rice.*  
598 2016;9:28. doi:10.1186/s12284-016-0101-x.
- 599 31. Rebolledo MC, Peña AL, Duitama J, Cruz DF, Dingkuhn M, Grenier C, et al. Combining Image  
600 Analysis, Genome Wide Association Studies and Different Field Trials to Reveal Stable Genetic Regions  
601 Related to Panicle Architecture and the Number of Spikelets per Panicle in Rice. *Front Plant Sci.*  
602 2016;7:1384. doi:10.3389/fpls.2016.01384.
- 603 32. Li D, Xu L, Tang XS, Sun S, Cai X, Zhang P. 3D imaging of greenhouse plants with an inexpensive  
604 binocular stereo vision system. *Remote Sens.* 2017;9.
- 605 33. Omasa K, Hosoi F, Botany AK-J of experimental, 2006 U. 3D lidar imaging for detecting and  
606 understanding plant responses and canopy structure. *J Exp Bot.* 2007;58:881–98.  
607 <https://academic.oup.com/jxb/article-abstract/58/4/881/425236>. Accessed 15 Mar 2019.
- 608 34. McCormick RF, Truong SK, Mullet JE. 3D Sorghum Reconstructions from Depth Images Identify  
609 QTL Regulating Shoot Architecture. *Plant Physiol.* 2016;172:823–34. doi:10.1104/pp.16.00948.
- 610 35. Brooks MJ, de Agapito L, Huynh DQ, Baumela L. Towards robust metric reconstruction via a  
611 dynamic uncalibrated stereo head. *Image Vis Comput.* 1998;16:989–1002. doi:10.1016/S0262-  
612 8856(98)00064-X.
- 613 36. Negahdaripour S, Hayashi BY, Aloimonos Y. Direct motion stereo for passive navigation. *IEEE*  
614 *Trans Robot Autom.* 1995;11:829–43. doi:10.1109/70.478430.
- 615 37. Fuhrmann S, Langguth F, Goesele M. MVE – A Multi-View Reconstruction Environment.  
616 EUROGRAPHICS Work Graph Cult Herit. 2014.
- 617 38. Sodhi P, Vijayarangan S, Wettergreen D. In-field segmentation and identification of plant structures  
618 using 3D imaging. In: 2017 IEEE/RSJ International Conference on Intelligent Robots and Systems  
619 (IROS). IEEE; 2017. p. 5180–7. doi:10.1109/IROS.2017.8206407.
- 620 39. Vijayarangan S, Sodhi P, Kini P, Bourne J, Du S, Sun H, et al. High-Throughput Robotic Phenotyping  
621 of Energy Sorghum Crops. In: n: Hutter M., Siegwart R. (eds) *Field and Service Robotics*. Springer



- 622 Proceedings in Advanced Robotics, vol 5. Springer, Cham. Springer, Cham; 2018. p. 99–113.  
623 doi:10.1007/978-3-319-67361-5\_7.
- 624 40. Duan T, Chapman SC, Holland E, Rebetzke GJ, Guo Y, Zheng B. Dynamic quantification of canopy  
625 structure to characterize early plant vigour in wheat genotypes. *J Exp Bot.* 2016;67:4523–34.  
626 doi:10.1093/jxb/erw227.
- 627 41. Hartmann A, Czauderna T, Hoffmann R, Stein N, Schreiber F. HTPheno: An image analysis pipeline  
628 for high-throughput plant phenotyping. *BMC Bioinformatics.* 2011;12:148. doi:10.1186/1471-2105-12-  
629 148.
- 630 42. Chaudhury A, Barron JL. Machine Vision System for 3D Plant Phenotyping. *IEEE/ACM Trans*  
631 *Comput Biol Bioinforma.* 2018;;1–1. doi:10.1109/TCBB.2018.2824814.
- 632 43. Vantaram S, Saber E. Survey of contemporary trends in color image segmentation. *J Electron*  
633 *Imaging.* 2012;21. [https://www.spiedigitallibrary.org/journals/Journal-of-Electronic-Imaging/volume-](https://www.spiedigitallibrary.org/journals/Journal-of-Electronic-Imaging/volume-21/issue-4/040901/Survey-of-contemporary-trends-in-color-image-segmentation/10.1117/1.JEI.21.4.040901.short)  
634 [21/issue-4/040901/Survey-of-contemporary-trends-in-color-image-](https://www.spiedigitallibrary.org/journals/Journal-of-Electronic-Imaging/volume-21/issue-4/040901/Survey-of-contemporary-trends-in-color-image-segmentation/10.1117/1.JEI.21.4.040901.short)  
635 [segmentation/10.1117/1.JEI.21.4.040901.short](https://www.spiedigitallibrary.org/journals/Journal-of-Electronic-Imaging/volume-21/issue-4/040901/Survey-of-contemporary-trends-in-color-image-segmentation/10.1117/1.JEI.21.4.040901.short).
- 636 44. Besl P, McKay N. Method for registration of 3-D shapes. *Sens Fusion IV Control Paradig.* 1992.  
637 [https://www.spiedigitallibrary.org/conference-proceedings-of-spie/1611/0000/Method-for-registration-of-](https://www.spiedigitallibrary.org/conference-proceedings-of-spie/1611/0000/Method-for-registration-of-3-D-shapes/10.1117/12.57955.short)  
638 [3-D-shapes/10.1117/12.57955.short](https://www.spiedigitallibrary.org/conference-proceedings-of-spie/1611/0000/Method-for-registration-of-3-D-shapes/10.1117/12.57955.short).
- 639 45. Cohen-Or D, Kaufman A. Fundamentals of surface voxelization. *Graph Model image Process.* 1995.  
640 <https://www.sciencedirect.com/science/article/pii/S1077316985710398>. Accessed 8 Apr 2019.
- 641 46. Gonzalez R, Woods R. *Digital Image Processing, Global Edition.* 2018.
- 642 47. R Core Team. *R: A Language and Environment for Statistical Computing.* 2017.
- 643 48. RStudio Team. *RStudio: Integrated Development Environment for R.* 2016.
- 644 49. Frank E, Harrell J, with contributions from Charles Dupont and many others. *Hmisc: Harrell*  
645 *Miscellaneous.* R package version 4.1-1. 2018.
- 646 50. Peterson BG, Peter C. *PerformanceAnalytics: Econometric Tools for Performance and Risk Analysis.*  
647 R package version 1.5.2. 2018.
- 648 51. Dhatt BK, Abshire N, Paul P, Hasanthika K, Sandhu J, Zhang Q, et al. Metabolic dynamics of  
649 developing rice seeds under high night-time temperature stress. *Front Plant Sci.* 2019;10:1443.
- 650 52. Peng S, Huang J, Sheehy JE, Laza RC, Visperas RM, Zhong X, et al. Rice yields decline with higher  
651 night temperature from global warming. *PNAS.* 2004;101:9971–5.  
652 [www.pnas.org/cgi/doi/10.1073/pnas.0403720101](http://www.pnas.org/cgi/doi/10.1073/pnas.0403720101).
- 653 53. Cheng W, Sakai H, Yagi K, Hasegawa T. Interactions of elevated [CO<sub>2</sub>] and night temperature on  
654 rice growth and yield. *Agric For Meteorol.* 2009;149:51–8. doi:10.1016/J.AGRFORMET.2008.07.006.
- 655 54. Coast O, Ellis RH, Murdoch AJ, Quiñones C, Jagadish KS V. High night temperature induces

656 contrasting responses for spikelet fertility, spikelet tissue temperature, flowering characteristics and grain  
657 quality in rice. *Funct Plant Biol.* 2015;42:149. doi:10.1071/FP14104.

658 55. Jongkaewwattana S, Geng S, Hill JE, Miller BC. Within-Panicle Variability of Grain Filling in Rice  
659 Cultivars with Different Maturities. *J Agron Crop Sci.* 1993;171:236–42. doi:10.1111/j.1439-  
660 037X.1993.tb00135.x.

661 56. Ellis RH. Rice seed quality development and temperature during late development and maturation.  
662 *Seed Sci Res.* 2011;21:95–101. doi:10.1017/S0960258510000425.

663 57. Begcy K, Sandhu J, Walia H. Transient Heat Stress During Early Seed Development Primes  
664 Germination and Seedling Establishment in Rice. *Front Plant Sci.* 2018;9:1768.

665 58. Folsom JJ, Begcy K, Hao X, Wang D, Walia H. Rice fertilization-Independent Endosperm1 regulates  
666 seed size under heat stress by controlling early endosperm development. *Plant Physiol.* 2014;165:238–48.  
667 doi:10.1104/pp.113.232413.

668 59. Humplík JF, Lazár D, Husičková A, Spíchal L. Automated phenotyping of plant shoots using imaging  
669 methods for analysis of plant stress responses – a review. *Plant Methods.* 2015;11:29.  
670 doi:10.1186/s13007-015-0072-8.

671 60. Li L, Zhang Q, Huang D, Li L, Zhang Q, Huang D. A Review of Imaging Techniques for Plant  
672 Phenotyping. *Sensors.* 2014;14:20078–111. doi:10.3390/s141120078.

673 61. Fahlgren N, Gehan MA, Baxter I. Lights, camera, action: high-throughput plant phenotyping is ready  
674 for a close-up. *Curr Opin Plant Biol.* 2015;24:93–9. doi:10.1016/J.PBI.2015.02.006.

675 62. Xiong X, Duan L, Liu L, Tu H, Yang P, Wu D, et al. Panicle-SEG: A robust image segmentation  
676 method for rice panicles in the field based on deep learning and superpixel optimization. *Plant Methods.*  
677 2017;13:1–15. doi:10.1186/s13007-017-0254-7.

678 63. He JQ, Harrison RJ, Li B. A novel 3D imaging system for strawberry phenotyping. *Plant Methods.*  
679 2017;13:1–8.

680

681
